# Supplementary material for: CD200R1 Contributes to Successful Functional Reinnervation after a Sciatic Nerve Injury
Source: MDPI journal article supplement (doi:10.3390/cells11111786), 2022-05-30
Supplement: s1 [file s1]

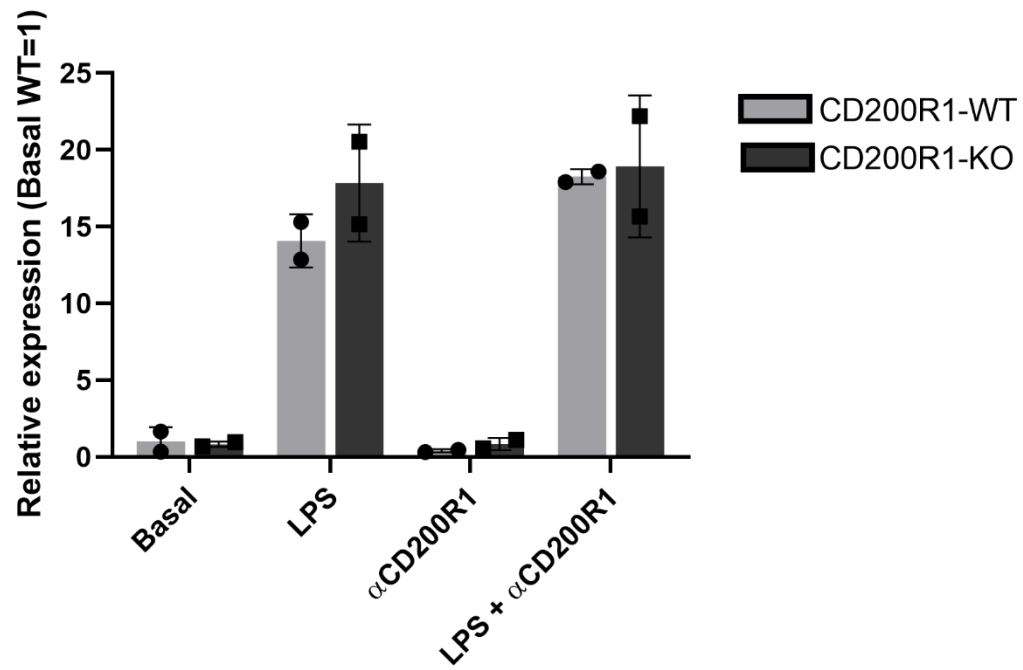

**Supplementary Figure S1.**  $\alpha$ CD200R1 does not activate CD200R1 in WT or CD200R1-knockout derived BMDM. IL1b mRNA expression in BMDM from WT and CD2001-knockout mice at 24 hours after no treatment (basal), LPS (500 ng/ml),  $\alpha$ CD200R1 (5  $\mu$ g/ml) or LPS +  $\alpha$ CD200R1. Data represent one experiment and is shown as mean  $\pm$  standard deviation (SD).
